# Supplementary material for: Home food preparation techniques impacted the availability of natural antioxidants and bioactivities in kale and broccoli
Source: Royal Society of Chemistry journal article supplement (doi:10.1039/c7fo00948h), 2017-12-01
Supplement: c7fo00948h1.pdf [file c7fo00948h1.pdf]

1 **Home food preparation techniques impacted the availability**  
2 **of natural antioxidants and bioactivities in kale and broccoli**

3 Lu Yu<sup>1</sup>, Boyan Gao<sup>1</sup>, Yanfang Li<sup>1</sup>, Thomas T. Y. Wang<sup>2</sup>, Yinghua Luo<sup>1</sup>, Jing Wang<sup>3\*</sup>, Liangli  
4 (Lucy) Yu<sup>1\*</sup>

5 <sup>1</sup>Department of Nutrition and Food Science, University of Maryland, College Park, MD 20742,  
6 USA

7 <sup>2</sup>Diet, Genomics and Immunology Laboratory, USDA-ARS, Beltsville, MD 20705, USA

8 <sup>3</sup>Beijing Advanced Innovation Center for Food Nutrition and Human Health and Beijing Higher  
9 Institution Engineering Research Center of Food Additives and Ingredients, Beijing Technology  
10 & Business University (BTBU), Beijing 100048, China

11

12

13

14

15 \*Corresponding authors E-mail addresses: wangjing@th.btbu.edu.cn (Jing Wang) and

16 [lyu5@umd.edu](mailto:lyu5@umd.edu) (Liangli Yu)

17

18

19

20

21

22 **Supplemental Materials:**

23 **Supplementary Table 1S.** Particle sizes of ground and chopped kale and broccoli (un-  
 24 microwaved). Numbers marked with different small letters indicate significance between kale  
 25 samples, numbers marked with capital letters indicate significance between broccoli samples ( $P$   
 26  $\leq 0.05$ ).

|          |                      | Average diameter/length (mm) |
|----------|----------------------|------------------------------|
| kale     | ground with blenders | 0.58-1.95a                   |
|          | chopped              | 30.42-35.12b                 |
| broccoli | ground with blenders | 0.62-1.93A                   |
|          | chopped              | 31.52-35.74B                 |

27

28 **Supplementary Table 2S.** Antioxidant properties of kale and broccoli processed by grinding  
 29 and chopping with/without microwaving. Antioxidant capacities were present as mean  $\pm$  SD (n =  
 30 3). Numbers marked with different small letters indicate significance without microwaving,  
 31 numbers marked with different capital letters indicate significance with microwaving, and \*  
 32 indicates difference between the same samples without and with microwaving ( $P \leq 0.05$ ).

|               | DPPH <sup>2</sup> ( $\mu$ mole Trolox FW-1) |                   | ABTS <sup>5</sup> ( $\mu$ mole Trolox FW-1) |                  |                    |
|---------------|---------------------------------------------|-------------------|---------------------------------------------|------------------|--------------------|
|               | kale                                        | broccoli          | kale                                        | broccoli         |                    |
| un-microwaved | blender 1                                   | 1.34b $\pm$ 0.16  | 0.54b $\pm$ 0.12                            | 1.41b $\pm$ 0.10 | 0.99bc $\pm$ 0.09  |
|               | blender 2                                   | 1.13b $\pm$ 0.31  | 0.36b $\pm$ 0.04                            | 1.37b $\pm$ 0.34 | 0.11bc $\pm$ 0.01  |
|               | blender 3                                   | 0.99b $\pm$ 0.17  | 0.33b $\pm$ 0.10                            | 1.37b $\pm$ 0.28 | 1.24c $\pm$ 0.10   |
|               | blender 4                                   | 0.85b $\pm$ 0.06  | 0.37b $\pm$ 0.07                            | 1.00b $\pm$ 0.14 | 0.91b $\pm$ 0.02   |
|               | blender 5                                   | 1.07b $\pm$ 0.16  | 0.33b $\pm$ 0.09                            | 1.42b $\pm$ 0.07 | 1.14bc $\pm$ 0.14  |
| chopped       | N/A                                         | N/A               | N/A                                         | N/A              |                    |
| microwaved    | blender 1                                   | 0.60B* $\pm$ 0.03 | 0.63B $\pm$ 0.21                            | 1.62B $\pm$ 0.06 | 1.47B* $\pm$ 0.35  |
|               | blender 2                                   | 0.85BC $\pm$ 0.32 | 0.62B $\pm$ 0.10                            | 1.59B $\pm$ 0.10 | 1.84B* $\pm$ 0.34  |
|               | blender 3                                   | 0.91BC $\pm$ 0.10 | 0.62B $\pm$ 0.12                            | 1.08B $\pm$ 0.18 | 1.82B* $\pm$ 0.094 |
|               | blender 4                                   | 0.63BC $\pm$ 0.13 | 0.50B $\pm$ 0.24                            | 1.09B $\pm$ 0.35 | 1.31B* $\pm$ 0.32  |
|               | blender 5                                   | 1.08C $\pm$ 0.23  | 0.68B $\pm$ 0.09                            | 1.67B $\pm$ 0.25 | 1.80B* $\pm$ 0.094 |

33

<sup>1</sup>DPPH: DPPH radical scavenging capacity

<sup>2</sup>ABTS: ABTS cation radical scavenging capacity

34
